# Supplementary material
Source: HighWire-hosted journal article supplement (http://www.jrheum.org/highwire/filestream/29795/field_highwire_adjunct_files/0/150671_Data_Suppl.pdf)
Supplement: 150671_Data_Suppl.pdf [file 150671_Data_Suppl.pdf]

## **PREVALENT USER ANALYSIS**

The prevalent user analysis examined a wide range of drugs, comparing current users (new and prevalent) to SLE patients without current use of any drug. Belimumab, cyclophosphamide, and cyclosporine were rare during the study period and therefore were not examined as main effects.

Because the effective sample size was greater, we used a somewhat more specific definition of eligibility for the prevalent user analysis. We required  $\geq 2$  physician diagnoses (inpatient or outpatient) of SLE (ICD-9 codes 710.0). In addition, we required patients to have either a positive ANA or a positive double-stranded (ds) DNA test indicating SLE (83% had a positive test); and we required patients to have had at least one dispensing of any SLE-related drug, rather than antimalarials or glucocorticoids alone.

Patients entered follow-up on their cohort entry date. Follow up ended at the first occurrence of serious infection, diagnoses of rheumatoid arthritis (ICD-9 714) or cancer (ICD-9 140-209), disenrollment, death, or the end of the study (December 31, 2012). A key difference between the new user and prevalent user design was that the prevalent user analysis followed patients for infection across multiple years and multiple drug exposures, while the new user design follows patients for a maximum of one year after the start of each new episode of antimalarials or glucocorticoids.

In the prevalent user analysis, SLE patients with current use of antimalarials had a lower risk of infection than those with no current use of any SLE medication (HR was 0.4, 95% CI 0.3–0.6).

With glucocorticoid monotherapy, risk increased with dosage from no increase with  $<7.5$  mg/d (HR 1.0, 95% CI 0.6–1.6) to a 50% increase with glucocorticoid of 7.5 to 15 mg/d (HR 1.5, 95% CI 1.0–2.3) to a 70% increase with glucocorticoids  $>15$  mg/d (HR 1.7, 95% CI 1.2–2.4) (Table A.1). Risks associated with disease-modifying antirheumatic drugs (DMARDs), used as monotherapies, were not appreciably different from risk with no current medication, although these comparisons were limited by small numbers.

Risk was similar for SLE patients without current medication exposure and those using combination glucocorticoids  $\leq 15$  mg/d plus antimalarials or immunosuppressants. The HR for the combination of glucocorticoids  $>15$  mg/d with azathioprine, compared with patients not using current medications, was 4.6 (95% CI 2.8–7.7), while the HRs for the combination of glucocorticoids  $>15$  mg/d with mycophenolate mofetil and methotrexate had somewhat wide confidence intervals and were similar to the HR for glucocorticoids  $>15$  mg/d used as monotherapy.

Prevalent user studies can be biased because long-term drug users typically are healthier than non-users<sup>1</sup>. On the other hand, drug use can serve as a marker of active SLE, although we adjusted for relevant specialist visits and laboratory tests. The findings of this prevalent user analysis are similar to those of the new-user analysis presented in the main body of this report, suggesting that these biases were small relative to the main effects of SLE, glucocorticoids, and antimalarials on risk of serious infection. They are also similar to a prevalent user analysis of 40,678 SLE patients in the Medicaid Analytic Extract database (2000–2006), in which antimalarial users had a reduced risk of infection compared to non-users (HR 0.73, 95% CI 0.68–

0.77).<sup>2</sup> Furthermore, the dose-response relationship of glucocorticoids on risk of infection is consistent with prior reports<sup>3-5</sup>, demonstrating the external validity of the study. The consistency of the prevalent and new user analyses, together with the greater statistical efficiency of the prevalent user analysis, strengthens the evidence that antimalarials reduce the risk of infection. We recommend greater use of antimalarials in SLE patients with and without nephritis.

## REFERENCES

1. Stürmer T, Jonsson Funk M, Poole C, Brookhart MA. Nonexperimental comparative effectiveness research using linked healthcare databases. *Epidemiol* 2011;22:298–301.
2. Feldman CH, Hiraki LT, Winkelmayr WC, Marty FM, Franklin JM, Kim SC, Costenbader KH. Serious infections among adult medicaid beneficiaries with systemic lupus erythematosus and lupus nephritis. *Arthritis Rheumatol*. 2015 Mar 13. doi: 10.1002/art.39070. [E-pub ahead of print].
3. Bosch X, Guilabert A, Pallarés L, Cerveral R, Ramos-Casals M, Bové A, et al. Infections in systemic lupus erythematosus: a prospective and controlled study of 110 patients. *Lupus* 2006;15:584–9.
4. Gladman DD, Hussain F, Ibanez D, Urowitz MB. The nature and outcome of infection in systemic lupus erythematosus. *Lupus* 2002;11:234–9.
5. Ruiz-Irastorza G, Olivares N, Ruiz-Arruza I, Martinez-Berriotxo A, Egurbide MV, Aguirre C. Predictors of major infections in systemic lupus erythematosus. *Arthritis Res Ther* 2009;11(4):R109.

**Supplementary Table 1. ICD-9 codes included in the operational definition of infection.**

| Category                                                                        | ICD-9 codes                                                                                              |
|---------------------------------------------------------------------------------|----------------------------------------------------------------------------------------------------------|
| Intestinal infectious diseases                                                  | 001-009                                                                                                  |
| Zoonotic and other bacterial diseases                                           | 021, 032.81, 033–035, 036.0, 036, 036.42, 038, 040, 041, 526.4, 528.4, 540, 566, 567, 569.5, 569.61, 572 |
| Syphilis and other venereal diseases                                            | 090–099                                                                                                  |
| Spirochetal diseases                                                            | 100                                                                                                      |
| Infectious diseases of the CNS                                                  | 049.0, 320, 321, 323, 324                                                                                |
| Disorders of the eye and adnexa                                                 | 372.0, 376.0                                                                                             |
| Otitis media and mastoiditis                                                    | 381.5, 382, 383.0, 383, 383.9                                                                            |
| Endocarditis and myocarditis                                                    | 421, 422.92                                                                                              |
| Infectious diseases of the respiratory system excluding pneumonia and influenza | 461, 462, 466, 472, 473, 475, 478.21, 478.22, 478.24, 510, 513                                           |
| Pneumonia                                                                       | 481, 482, 483, 485, 486,                                                                                 |
| Infectious diseases of the genitourinary system                                 | 590, 597, 599.0, 601.2, 608.4, 611.0, 614.3, 614.4                                                       |
| Infectious diseases of skin                                                     | 680, 681, 682, 684, 686, 686.8, 686.9                                                                    |
| Infection related to arthropathy, fasciitis, and osteomyelitis                  | 711, 728.86, 730                                                                                         |
| Bacteremia                                                                      | 790.7                                                                                                    |
| Post-traumatic wound infection                                                  | 958.3                                                                                                    |
| Device-associated infections                                                    | 996.6                                                                                                    |
| Post-operative infection                                                        | 998.5                                                                                                    |

ICD: International Classification of Disease; CNS: central nervous system.

**Supplementary Figure 1. Study population**

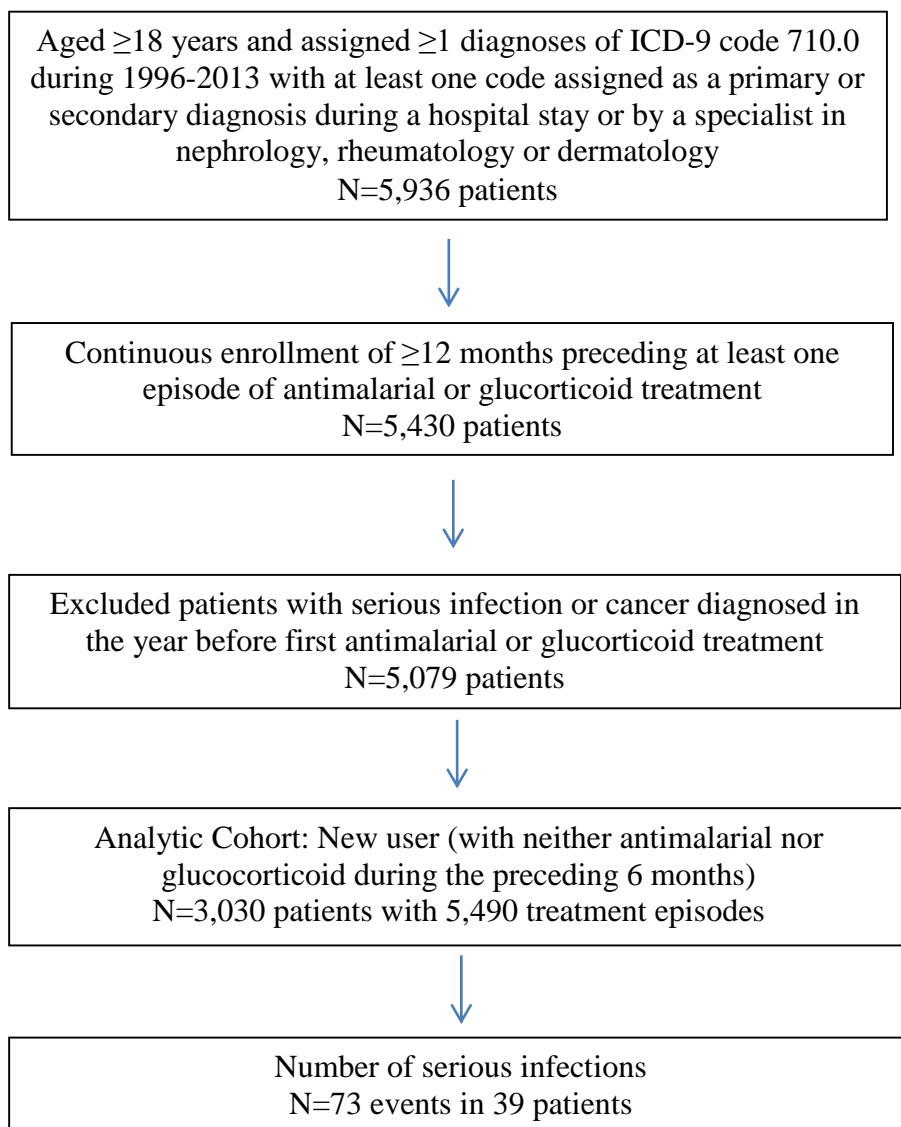

ICD: International Classification of Disease.

**Supplementary Table 2. New-user analysis; full-model results. Adjusted hazard ratio for the relationship of serious infection with new use of glucocorticoid (GC) compared with antimalarial (AM) therapy.**

| Variable                   | HR              | 95% CI     |
|----------------------------|-----------------|------------|
| Antimalarial monotherapy   | 1.0 (reference) |            |
| GC ≤15 mg/d + antimalarial | 0.0             | 0.0 – 0.8  |
| GC ≤15 mg/d monotherapy    | 3.9             | 1.7 – 9.2  |
| GC >15 mg/d + antimalarial | 4.5             | 1.7 – 11.8 |
| GC >15 mg/d monotherapy    | 4.2             | 2.0 – 8.8  |
| Year (continuous)          | 1.0             | 1.0 – 1.0  |
| Age (per year)             | 1.0             | 1.0 – 1.0  |
| Charlson (per unit)        | 1.2             | 1.0 – 1.3  |
| Other SLE therapy (y/n)    | 1.1             | 0.7 – 1.9  |
| Renal disease (y/n)        | 5.3             | 2.8 – 10.2 |
| African American           | 1.9             | 1.0 – 3.3  |
| Hispanic                   | 1.8             | 1.1 – 3.1  |
| White or Asian             | 1.0 (reference) |            |
| Hematocrit <34%            | 2.6             | 1.5 – 4.5  |
| Hematocrit 34–39%          | 1.0 (reference) |            |
| Hematocrit ≥40%            | 1.7             | 0.9 – 3.2  |

SLE: systemic lupus erythematosus.

**Supplementary Table A1. Prevalent user analysis: Adjusted\* hazard ratio for the relationship of current\*\* use of monotherapy with risk of serious infection among patients with SLE.**

| Current medication               | No. of serious infections | Patient-years | Crude incidence rate (IR), % | Adjusted HR,% | 95% CI  |
|----------------------------------|---------------------------|---------------|------------------------------|---------------|---------|
| SLE without current medication   | 146                       | 7,555         | 1.9                          | 1.0           | Ref.    |
| SLE with current monotherapy     |                           |               |                              |               |         |
| Antimalarial                     | 58                        | 4,584         | 1.3                          | 0.4           | 0.3–0.6 |
| GC <7.5 mg/d                     | 13                        | 453           | 4.6                          | 1.0           | 0.6–1.6 |
| GC 7.5-15 mg/d                   | 31                        | 602           | 5.0                          | 1.5           | 1.0–2.3 |
| GC >15 mg/d                      | 89                        | 1,016         | 8.8                          | 1.7           | 1.2–2.4 |
| Azathioprine                     | 16                        | 542           | 3.0                          | 1.2           | 0.7–1.9 |
| Mycophenolate mofetil            | 16                        | 519           | 3.1                          | 1.2           | 0.8–1.9 |
| Methotrexate                     | 4                         | 274           | 1.5                          | 0.6           | 0.2–1.8 |
| GC ≤15 mg/d combined with...     |                           |               |                              |               |         |
| Antimalarial                     | 13                        | 662           | 2.0                          | 1.0           | 0.6–1.6 |
| Azathioprine                     | 12                        | 258           | 4.7                          | 1.2           | 0.6–2.3 |
| Mycophenolate mofetil            | 7                         | 259           | 2.7                          | 1.0           | 0.7–1.6 |
| Methotrexate                     | 4                         | 130           | 3.1                          | 1.3           | 0.4–4.3 |
| GC >15 mg/d combined with ...*** |                           |               |                              |               |         |
| AM monotherapy                   | 0                         | 6             | 0                            | 0             | —       |
| Azathioprine                     | 34                        | 208           | 16.4                         | 4.6           | 2.8–7.7 |
| Mycophenolate mofetil            | 15                        | 238           | 6.3                          | 1.6           | 0.9–3.0 |
| Methotrexate                     | 7                         | 67            | 10.5                         | 2.5           | 0.9–6.7 |

\*Adjusted for each of the other drug regimens, age (continuous), sex (M/F), race/ethnicity (five classes); cohort entry year; Charlson comorbidity index (continuous), and renal disease (yes/no ICD-9 580-599); the number of visits (continuous) in the year before cohort entry to rheumatology, nephrology, pulmonology, neurology, and hematology; serum creatinine (continuous), hematocrit (continuous), white blood cell count (continuous), complement C3 and C4 (continuous); and number of positive tests (continuous) from among ANA, anti-dsDNA, APL, anti-Sm, anti-Ro or La, and RF. \*\*For each drug regimen, patients contributed to risk sets formed while the patients were a current user of the drug regimens and during the 30 days following their last days of drug supply. Otherwise, they contributed to risk sets “without current medication. \*\*\*Glucocorticoids (GC) >15 mg/d combined with azathioprine included 7 patient-years (no events) with antimalarial exposure; combined with mycophenolate mofetil, 3 patient-years (no events) with antimalarial exposure; and combined with methotrexate, 4 patient-years (no events) with antimalarial exposure.
